# Supplementary material for: A Novel Three‐miRNA Signature Identified Using Bioinformatics Predicts Survival in Esophageal Carcinoma
Source: Hindawi journal article supplement (doi:10.1155/2020/5973082), 2020-01-01
Supplement: f1 [file 5973082.f1.pdf]

**Supplementary Table 1.** The names of the common differentially expressed miRNAs (DEMs) among the three datasets

---

| DEMs           |                                                                                                                                                                                                                                                                                   |
|----------------|-----------------------------------------------------------------------------------------------------------------------------------------------------------------------------------------------------------------------------------------------------------------------------------|
| Up-regulated   | miR-181a, miR-183-3p, miR-196a, miR-218, miR-23b, miR-34c-5p, miR-370, miR-409-5p, miR-431-5p, miR-492, miR-493, miR-503, miR-523, miR-542-5p, miR-548a-3p, miR-574, miR-631, miR-663b, miR-720, miR-767, miR-769-5p, miR-787, miR-796, miR-870, miR-7-5p, miR-1180, miR-1301-3p, |
| Down-regulated | miR-1, miR-139-5p, miR-150, miR-375, miR-497, miR-1224-5p                                                                                                                                                                                                                         |

---

The cut-off criteria is  $P < 0.05$  and  $|\log_2FC| > 1.0$ .

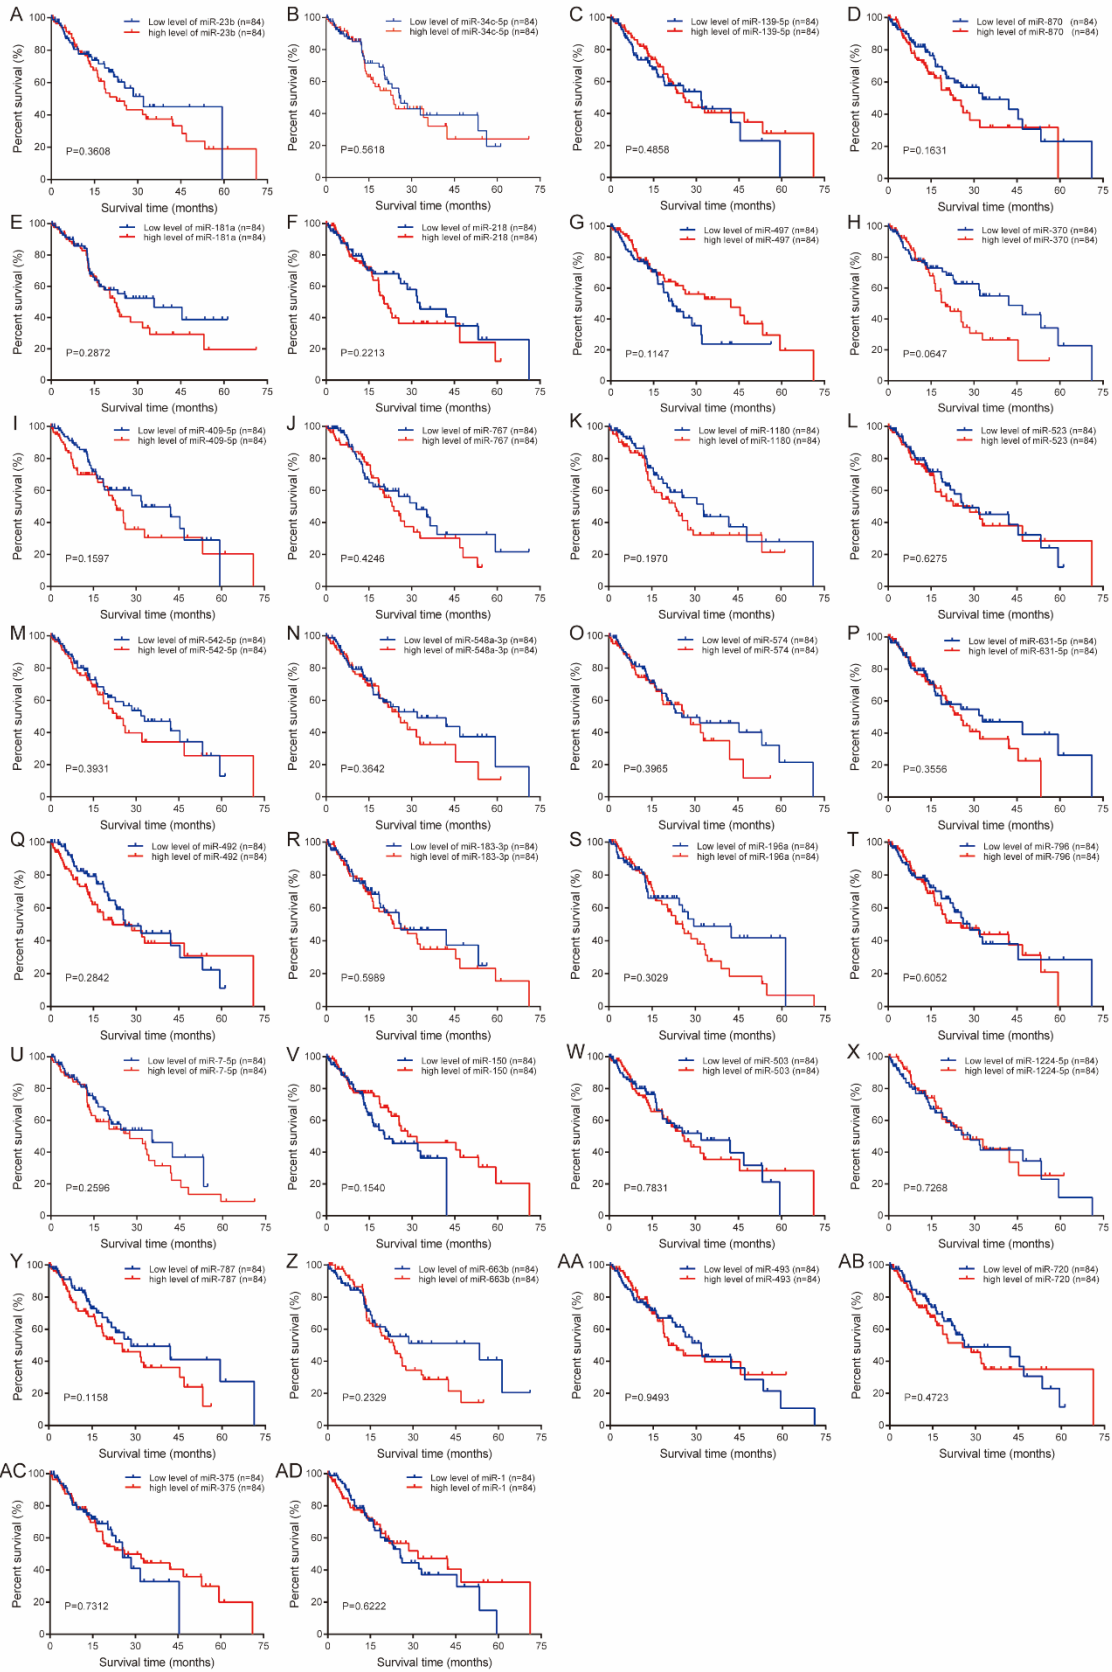

**Supplementary Figure 1.** Kaplan-Meier survival curves of other 30 differentially expressed miRNA based on TCGA
